# Supplementary material for: Association between adiposity measures and COPD risk in Chinese adults
Source: PubMed Central journal article supplement — Eur Respir J. 2020 Apr 30;55(4):1901899. doi: 10.1183/13993003.01899-2019 (PMC7236866; doi:10.1183/13993003.01899-2019), 2020-04-30
Supplement: ERJ-01899-2019.SUPPLEMENT.pdf [file ERJ-01899-2019.SUPPLEMENT.pdf]

---

## **Association between adiposity measures and COPD risk in Chinese adults**

### **Online Data Supplement**

Jiachen Li, Lu Zhu, Yuxia Wei, Jun Lv, Yu Guo, Zheng Bian, Huaidong Du, Ling Yang, Yiping Chen, Yonglin Zhou, Ruqin Gao, Junshi Chen, Zhengming Chen, Weihua Cao, Canqing Yu, Liming Li, on behalf of the China Kadoorie Biobank Collaborative Group

### **Table of Contents**

#### **Members of the China Kadoorie Biobank collaborative group**

**Figure S1.** Geographic locations of the CKB study regions

**Table S1.** Baseline characteristics of participants by baseline waist-to-hip ratio and waist-to-height ratio

**Table S2.** Subgroup analysis for BMI and COPD according to age, area, education level, smoking status, physical activity, and menopause status

**Table S3.** Subgroup analysis for waist circumference and COPD according to age, area, education level, smoking status, physical activity, and menopause status

**Table S4.** Association of baseline waist-to-hip ratio and waist-to-height ratio with risk of COPD

**Table S5.** Sensitivity analysis for the association between adiposity measures and COPD

---

## **Members of the China Kadoorie Biobank collaborative group**

**International Steering Committee:** Junshi Chen, Zhengming Chen (PI), Robert Clarke, Rory Collins, Yu Guo, Liming Li (PI), Jun Lv, Richard Peto, Robin Walters.

**International Co-ordinating Centre, Oxford:** Daniel Avery, Ruth Boxall, Derrick Bennett, Yumei Chang, Yiping Chen, Zhengming Chen, Robert Clarke, Huaidong Du, Simon Gilbert, Alex Hacker, Mike Hill, Michael Holmes, Andri Iona, Christiana Kartsonaki, Rene Kerosi, Ling Kong, Om Kurmi, Garry Lancaster, Sarah Lewington, Kuang Lin, John McDonnell, Iona Millwood, Qunhua Nie, Jayakrishnan Radhakrishnan, Paul Ryder, Sam Sansome, Dan Schmidt, Paul Sherliker, Rajani Sohoni, Becky Stevens, Iain Turnbull, Robin Walters, Jenny Wang, Lin Wang, Neil Wright, Ling Yang, Xiaoming Yang.

**National Co-ordinating Centre, Beijing:** Zheng Bian, Yu Guo, Xiao Han, Can Hou, Jun Lv, Pei Pei, Chao Liu, Canqing Yu.

**10 Regional Co-ordinating Centres:**

**Qingdao CDC:** Zengchang Pang, Ruqin Gao, Shanpeng Li, Shaojie Wang, Yongmei Liu, Ranran Du, Yajing Zang, Liang Cheng, Xiaocao Tian, Hua Zhang, Yaoming Zhai, Feng Ning, Xiaohui Sun, Feifei Li.

**Licang CDC:** Silu Lv, Junzheng Wang, Wei Hou.

**Heilongjiang Provincial CDC:** Mingyuan Zeng, Ge Jiang, Xue Zhou.

**Nangang CDC:** Liqiu Yang, Hui He, Bo Yu, Yanjie Li, Qinai Xu, Quan Kang, Ziyang Guo.

**Hainan Provincial CDC:** Dan Wang, Ximin Hu, Jinyan Chen, Yan Fu, Zhenwang Fu, Xiaohuan Wang.

**Meilan CDC:** Min Weng, Zhendong Guo, Shukuan Wu, Yilei Li, Huimei Li, Zhifang Fu.

**Jiangsu Provincial CDC:** Ming Wu, Yonglin Zhou, Jinyi Zhou, Ran Tao, Jie Yang, Jian Su.

**Suzhou CDC:** Fang liu, Jun Zhang, Yihe Hu, Yan Lu, , Liangcai Ma, Aiyu Tang, Shuo Zhang, Jianrong Jin, Jingchao Liu.

**Guangxi Provincial CDC:** Zhenzhu Tang, Naying Chen, Ying Huang.

**Liuzhou CDC:** Mingqiang Li, Jinhuai Meng, Rong Pan, Qilian Jiang, Jian Lan, Yun Liu, Liuping Wei, Liyuan Zhou, Ningyu Chen Ping Wang, Fanwen Meng, Yulu Qin,, Sisi Wang.

**Sichuan Provincial CDC:** Xianping Wu, Ningmei Zhang, Xiaofang Chen, Weiwei Zhou.

**Pengzhou CDC:** Guojin Luo, Jianguo Li, Xiaofang Chen, Xunfu Zhong, Jiaqiu Liu, Qiang Sun.

**Gansu Provincial CDC:** Pengfei Ge, Xiaolan Ren, Caixia Dong.

**Maiji CDC:** Hui Zhang, Enke Mao, Xiaoping Wang, Tao Wang, Xi zhang.

**Henan Provincial CDC:** Ding Zhang, Gang Zhou, Shixian Feng, Liang Chang, Lei Fan.

**Huixian CDC:** Yulian Gao, Tianyou He, Huarong Sun, Pan He, Chen Hu, Xukui Zhang, Huifang Wu, Pan He.

**Zhejiang Provincial CDC:** Min Yu, Ruying Hu, Hao Wang.

**Tongxiang CDC:** Yijian Qian, Chunmei Wang, Kaixu Xie, Lingli Chen, Yidan Zhang, Dongxia Pan, Qijun Gu.

**Hunan Provincial CDC:** Yuelong Huang, Biyun Chen, Li Yin, Huilin Liu, Zhongxi Fu, Qiaohua Xu.

**Liuyang CDC:** Xin Xu, Hao Zhang, Huajun Long, Xianzhi Li, Libo Zhang, Zhe Qiu.

Figure S1. Geographic locations of the CKB study regions

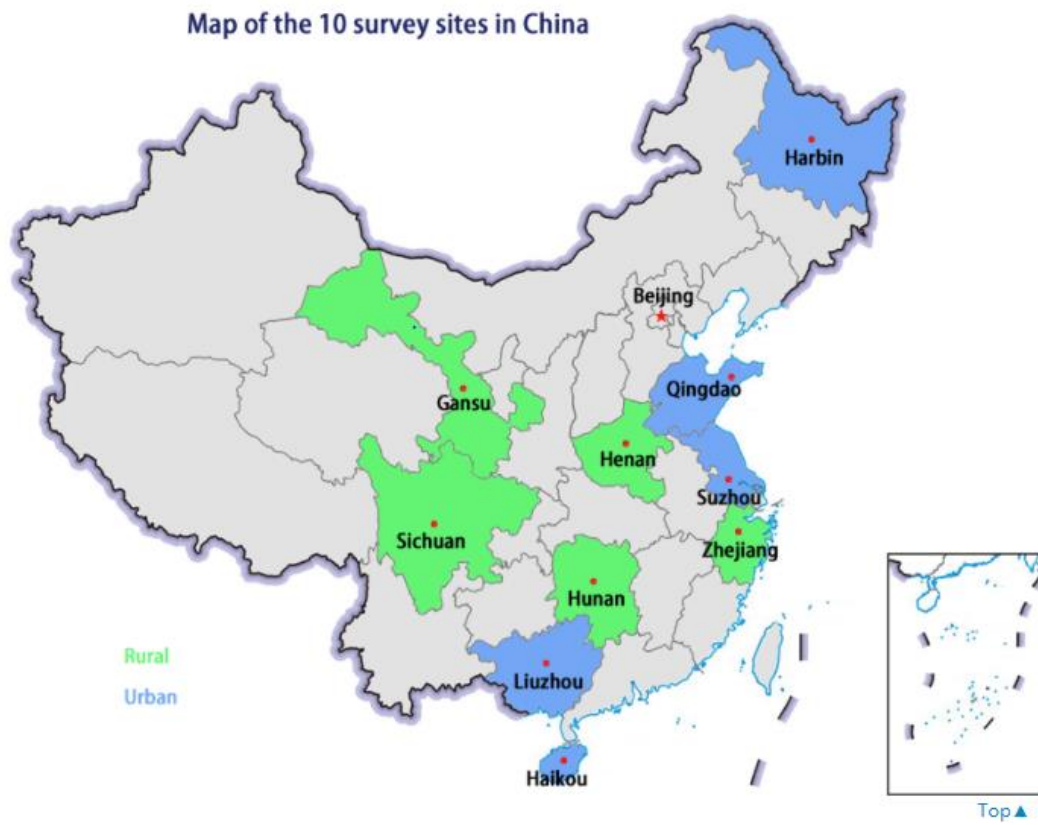

**Table S1. Baseline characteristics of participants by baseline waist-to-hip ratio and waist-to-height ratio (n=452,259)**

|                                      | WHR            |                | WHtR    |         |
|--------------------------------------|----------------|----------------|---------|---------|
|                                      | < 0.9 (male)   | ≥ 0.9 (male)   | < 0.5   | ≥ 0.5   |
|                                      | < 0.8 (female) | ≥ 0.8 (female) |         |         |
| Number of participants               | 124,096        | 328,163        | 217,831 | 234,428 |
| Age (years)                          | 49.5           | 51.8           | 49.4    | 52.7    |
| Female (%)                           | 33.3           | 69.7           | 54.9    | 64.1    |
| Urban (%)                            | 45.7           | 42.8           | 39.5    | 47.4    |
| Married (%)                          | 89.6           | 91.7           | 90.3    | 91.9    |
| Primary school or lower (%)          | 49.3           | 49.8           | 49.0    | 50.2    |
| Current smoker (%)                   | 27.3           | 25.6           | 27.9    | 24.6    |
| Passive smoker (%)                   | 44.8           | 44.6           | 44.7    | 44.6    |
| Cooking with solid fuel (%)          | 37.8           | 36.0           | 37.1    | 35.7    |
| Heating with solid fuel (%)          | 37.0           | 37.3           | 37.2    | 37.2    |
| Drinking weekly (%)                  | 13.7           | 15.7           | 14.6    | 15.2    |
| Consuming fruits daily (%)           | 18.8           | 18.4           | 18.6    | 18.5    |
| Consuming fresh vegetables daily (%) | 94.5           | 94.7           | 94.4    | 94.9    |
| Consuming meat daily (%)             | 27.6           | 30.2           | 28.1    | 30.5    |
| Physical activity (Met-h/d)          | 22.5           | 21.3           | 22.3    | 21.1    |
| Respiratory symptoms (%)             | 11.4           | 12.7           | 11.4    | 13.1    |

Note: WHR, waist-to-hip ratio; WHtR, waist-to-height ratio

Predictive margins adjusting for age, sex and region were presented.

**Table S2. Subgroup analysis for BMI and COPD according to age, area, education level, smoking status, physical activity, and menopause status**

|                                      | Number  | BMI (kg/m <sup>2</sup> ) |                |                  |                  | P <sub>interaction</sub> |
|--------------------------------------|---------|--------------------------|----------------|------------------|------------------|--------------------------|
|                                      |         | < 18.5                   | 18.5 to < 24.0 | 24.0 to < 28.0   | ≥ 28.0           |                          |
| <b>Age (years)</b>                   |         |                          |                |                  |                  | 0.0225                   |
| <50                                  | 217,796 | 1.40 (1.12-1.76)         | 1.00           | 0.88 (0.76-1.01) | 0.95 (0.74-1.21) |                          |
| 50-59                                | 139,336 | 2.04 (1.80-2.32)         | 1.00           | 0.97 (0.87-1.07) | 1.05 (0.89-1.24) |                          |
| ≥60                                  | 95,127  | 1.73 (1.60-1.88)         | 1.00           | 0.84 (0.77-0.91) | 0.89 (0.78-1.01) |                          |
| <b>Area</b>                          |         |                          |                |                  |                  | 0.0004                   |
| Urban                                | 197,228 | 1.83 (1.55-2.16)         | 1.00           | 0.78 (0.69-0.88) | 0.85 (0.71-1.01) |                          |
| Rural                                | 255,031 | 1.77 (1.65-1.90)         | 1.00           | 0.93 (0.87-0.99) | 1.01 (0.90-1.13) |                          |
| <b>Education</b>                     |         |                          |                |                  |                  | 0.2853                   |
| Primary school or lower              | 224,483 | 1.79 (1.67-1.92)         | 1.00           | 0.90 (0.84-0.96) | 0.97 (0.87-1.08) |                          |
| Middle/high School                   | 201,723 | 1.73 (1.46-2.04)         | 1.00           | 0.85 (0.75-0.96) | 0.92 (0.76-1.12) |                          |
| College or higher                    | 26,053  | 1.79 (0.81-3.94)         | 1.00           | 1.22 (0.83-1.81) | 0.99 (0.55-1.79) |                          |
| <b>Smoking</b>                       |         |                          |                |                  |                  | 0.0024                   |
| Non-current smoker                   | 333,263 | 1.68 (1.54-1.84)         | 1.00           | 0.92 (0.86-0.99) | 1.00 (0.90-1.11) |                          |
| Current smoker                       | 118,996 | 1.87 (1.70-2.06)         | 1.00           | 0.82 (0.74-0.91) | 0.82 (0.68-0.99) |                          |
| <b>Physical activity<sup>a</sup></b> |         |                          |                |                  |                  | 0.0325                   |
| Low                                  | 150,351 | 1.76 (1.61-1.93)         | 1.00           | 0.88 (0.81-0.96) | 0.93 (0.81-1.07) |                          |
| Middle                               | 151,125 | 1.72 (1.53-1.93)         | 1.00           | 0.96 (0.87-1.06) | 0.96 (0.81-1.14) |                          |
| High                                 | 150,783 | 1.82 (1.57-2.10)         | 1.00           | 0.81 (0.72-0.91) | 0.97 (0.80-1.19) |                          |
| <b>Menopause<sup>b</sup></b>         |         |                          |                |                  |                  | 0.2271                   |
| No                                   | 122,093 | 1.38 (1.01-1.90)         | 1.00           | 0.81 (0.67-0.98) | 0.88 (0.64-1.22) |                          |
| Yes                                  | 147,917 | 1.68 (1.52-1.86)         | 1.00           | 0.95 (0.87-1.04) | 1.08 (0.96-1.23) |                          |

Note: BMI, body mass index



|                        | Number  | Waist circumference (cm) |      |                  |                  |                  | P <sub>interaction</sub> |
|------------------------|---------|--------------------------|------|------------------|------------------|------------------|--------------------------|
| Low                    | 150,351 | 1.15 (1.04-1.27)         | 1.00 | 1.14 (1.04-1.25) | 1.24 (1.11-1.39) | 1.56 (1.36-1.78) |                          |
| Middle                 | 151,125 | 1.16 (1.04-1.30)         | 1.00 | 1.07 (0.96-1.19) | 1.35 (1.18-1.54) | 1.43 (1.21-1.69) |                          |
| High                   | 150,783 | 1.20 (1.05-1.38)         | 1.00 | 1.27 (1.11-1.45) | 1.37 (1.16-1.62) | 1.84 (1.51-2.25) |                          |
| Menopause <sup>b</sup> |         |                          |      |                  |                  |                  | 0.9419                   |
| No                     | 122,093 | 1.18 (0.89-1.57)         | 1.00 | 1.14 (0.93-1.40) | 1.25 (0.95-1.64) | 1.51 (1.08-2.11) |                          |
| Yes                    | 147,917 | 1.30 (1.15-1.46)         | 1.00 | 1.15 (1.05-1.26) | 1.28 (1.15-1.43) | 1.39 (1.22-1.58) |                          |

Note: Results were based on model 3. *P* values for interaction were calculated by likelihood ratio test comparing models with and without a cross-product term.

<sup>a</sup> Three groups were defined by gender-specific tertiles of metabolic Equivalent Task-hours.

<sup>b</sup> Among 270,010 female participants who had menopause status data at baseline

**Table S4. Association of baseline waist-to-hip ratio and waist-to-height ratio with risk of COPD**

|                              | WHR           |                   |                  | WHtR  |                  |
|------------------------------|---------------|-------------------|------------------|-------|------------------|
|                              | <0.9 (male)   | 0.9-0.95 (male)   | ≥0.95 (male)     | <0.5  | ≥0.5             |
|                              | <0.8 (female) | 0.8-0.85 (female) | ≥0.85 (female)   |       |                  |
| Total (n=452,259)            |               |                   |                  |       |                  |
| Cases                        | 3,241         | 2,321             | 5,177            | 5,228 | 5,511            |
| Rate (per/1000 person-years) | 2.63          | 1.97              | 2.50             | 2.40  | 2.40             |
| HR (95% CI) model 1          | 1.00          | 0.88 (0.83-0.93)  | 0.94 (0.90-0.99) | 1.00  | 0.94 (0.90-0.98) |
| HR (95% CI) model 2          | 1.00          | 0.91 (0.86-0.96)  | 0.95 (0.91-1.00) | 1.00  | 0.95 (0.91-0.99) |
| HR (95% CI) model 3          | 1.00          | 0.97 (0.91-1.02)  | 1.10 (1.04-1.17) | 1.00  | 1.12 (1.07-1.19) |
| Male (n=182,209)             |               |                   |                  |       |                  |
| Cases                        | 2,631         | 1,299             | 1,283            | 3,151 | 2,062            |
| Rate (per/1000 person-years) | 3.29          | 2.50              | 2.80             | 3.32  | 2.49             |
| HR (95% CI) model 1          | 1.00          | 0.89 (0.83-0.95)  | 0.97 (0.90-1.03) | 1.00  | 0.87 (0.82-0.92) |
| HR (95% CI) model 2          | 1.00          | 0.91 (0.85-0.98)  | 0.98 (0.91-1.05) | 1.00  | 0.90 (0.85-0.95) |
| HR (95% CI) model 3          | 1.00          | 1.09 (1.02-1.18)  | 1.37 (1.26-1.49) | 1.00  | 1.29 (1.19-1.40) |
| Female (n=270,050)           |               |                   |                  |       |                  |
| Cases                        | 610           | 1,022             | 3,894            | 2,077 | 3,449            |
| Rate (per/1000 person-years) | 1.41          | 1.55              | 2.42             | 1.67  | 2.35             |
| HR (95% CI) model 1          | 1.00          | 0.89 (0.81-0.99)  | 0.94 (0.86-1.03) | 1.00  | 1.01 (0.96-1.07) |
| HR (95% CI) model 2          | 1.00          | 0.90 (0.81-1.00)  | 0.94 (0.86-1.03) | 1.00  | 1.00 (0.95-1.06) |
| HR (95% CI) model 3          | 1.00          | 0.91 (0.82-1.01)  | 0.97 (0.88-1.06) | 1.00  | 1.05 (0.98-1.13) |

Note: WHR, waist-to-hip ratio; WHtR, waist-to-height ratio



---

Models were adjusted for: model 1: sex (only in total population); Model 2: additionally included education (none or primary school, middle or high school, college or university), marital status (married, widowed, divorced or separated, never married), smoking (never or occasional, former and having quit <5, or  $\geq$ 5 years, current smoking <15, 15 to 24, or  $\geq$ 25 cigarettes/day), passive smoking (never lived with smoker, lived with smoker for <20 years, lived with smoker for  $\geq$ 20 years and exposure < 20 hours/week, lived with smoker for  $\geq$ 20 years and exposure  $\geq$ 20 hours/week), cooking and heating fuel type (coal, wood/charcoal, cleaner fuel, other fuels, no cooking/heating), alcohol drinking (non-drinker, occasional drinker, former drinker, regular drinker), intake frequencies of red meat, fresh fruits, and vegetables (daily, 4-6 days/week, 1-3 days/week, monthly, rarely or never), physical activity (MET h/day), and respiratory symptoms (presence or absence); model3: additionally adjusted for BMI.

**Table S5. Sensitivity analysis for the association between adiposity measures and COPD (HR and 95% CI)**

|                                 | Among never smokers (n= 284,259) | Excluding cases in the first three years (n= 450,410) | LLN definition for airflow obstruction (n= 445,350) | Excluding prevalent diabetes (n= 424,045) |
|---------------------------------|----------------------------------|-------------------------------------------------------|-----------------------------------------------------|-------------------------------------------|
| <b>BMI (kg/m<sup>2</sup>)</b>   |                                  |                                                       |                                                     |                                           |
| < 18.5                          | 1.64 (1.48-1.81)                 | 1.70 (1.58-1.83)                                      | 1.79 (1.67-1.90)                                    | 1.76 (1.64-1.88)                          |
| 18.5 to < 24.0                  | 1.00                             | 1.00                                                  | 1.00                                                | 1.00                                      |
| 24.0 to < 28.0                  | 0.94 (0.87-1.02)                 | 0.91 (0.86-0.97)                                      | 0.89 (0.84-0.95)                                    | 0.89 (0.84-0.94)                          |
| ≥ 28.0                          | 1.06 (0.94-1.20)                 | 0.99 (0.90-1.10)                                      | 0.95 (0.86-1.04)                                    | 0.96 (0.87-1.06)                          |
| <b>Waist circumference (cm)</b> |                                  |                                                       |                                                     |                                           |
| < 70 (male)                     | 1.26 (1.13-1.41)                 | 1.19 (1.10-1.28)                                      | 1.17 (1.09-1.25)                                    | 1.16 (1.08-1.24)                          |
| < 65 (female)                   |                                  |                                                       |                                                     |                                           |
| 70 to < 85 (male)               | 1.00                             | 1.00                                                  | 1.00                                                | 1.00                                      |
| 65 to < 80 (female)             |                                  |                                                       |                                                     |                                           |
| 85 to < 90 (male)               | 1.15 (1.05-1.25)                 | 1.10 (1.03-1.18)                                      | 1.15 (1.08-1.23)                                    | 1.15 (1.08-1.23)                          |
| 80 to < 85 (female)             |                                  |                                                       |                                                     |                                           |
| 90 to < 95 (male)               | 1.25 (1.13-1.38)                 | 1.20 (1.10-1.31)                                      | 1.31 (1.21-1.42)                                    | 1.31 (1.21-1.41)                          |
| 85 to < 90 (female)             |                                  |                                                       |                                                     |                                           |
| ≥ 95 (male)                     | 1.40 (1.23-1.59)                 | 1.48 (1.34-1.64)                                      | 1.57 (1.43-1.72)                                    | 1.58 (1.43-1.74)                          |
| ≥ 90 (female)                   |                                  |                                                       |                                                     |                                           |
| <b>WHR</b>                      |                                  |                                                       |                                                     |                                           |
| < 0.9 (male)                    | 1.00                             | 1.00                                                  | 1.00                                                | 1.00                                      |
| < 0.8 (female)                  |                                  |                                                       |                                                     |                                           |
| 0.9-0.95 (male)                 | 0.90 (0.82-0.99)                 | 0.96 (0.90-1.02)                                      | 0.97 (0.92-1.03)                                    | 0.96 (0.91-1.02)                          |
| 0.8-0.85 (female)               |                                  |                                                       |                                                     |                                           |
| ≥ 0.95 (male)                   | 0.97 (0.89-1.07)                 | 1.06 (1.00-1.14)                                      | 1.11 (1.04-1.18)                                    | 1.11 (1.04-1.18)                          |

---

|                      | Among never smokers (n= 284,259) | Excluding cases in the first three years (n= 450,410) | LLN definition for airflow obstruction (n= 445,350) | Excluding prevalent diabetes (n= 424,045) |
|----------------------|----------------------------------|-------------------------------------------------------|-----------------------------------------------------|-------------------------------------------|
| $\geq 0.85$ (female) |                                  |                                                       |                                                     |                                           |
| <b>WHtR</b>          |                                  |                                                       |                                                     |                                           |
| < 0.5                | 1.00                             | 1.00                                                  | 1.00                                                | 1.00                                      |
| $\geq 0.5$           | 1.06 (0.98-1.15)                 | 1.06 (1.00-1.13)                                      | 1.13 (1.07-1.19)                                    | 1.12 (1.06-1.18)                          |

---

Note: BMI, body mass index; WHR, waist-to-hip ratio; WHtR, waist-to-height ratio; LLN, lower-limit of normal

Results were based on model 3.
